# Supplementary material
Source: JCI journal article supplement (doi:10.1172/jci154475)
Supplement: sd1 [file 1]

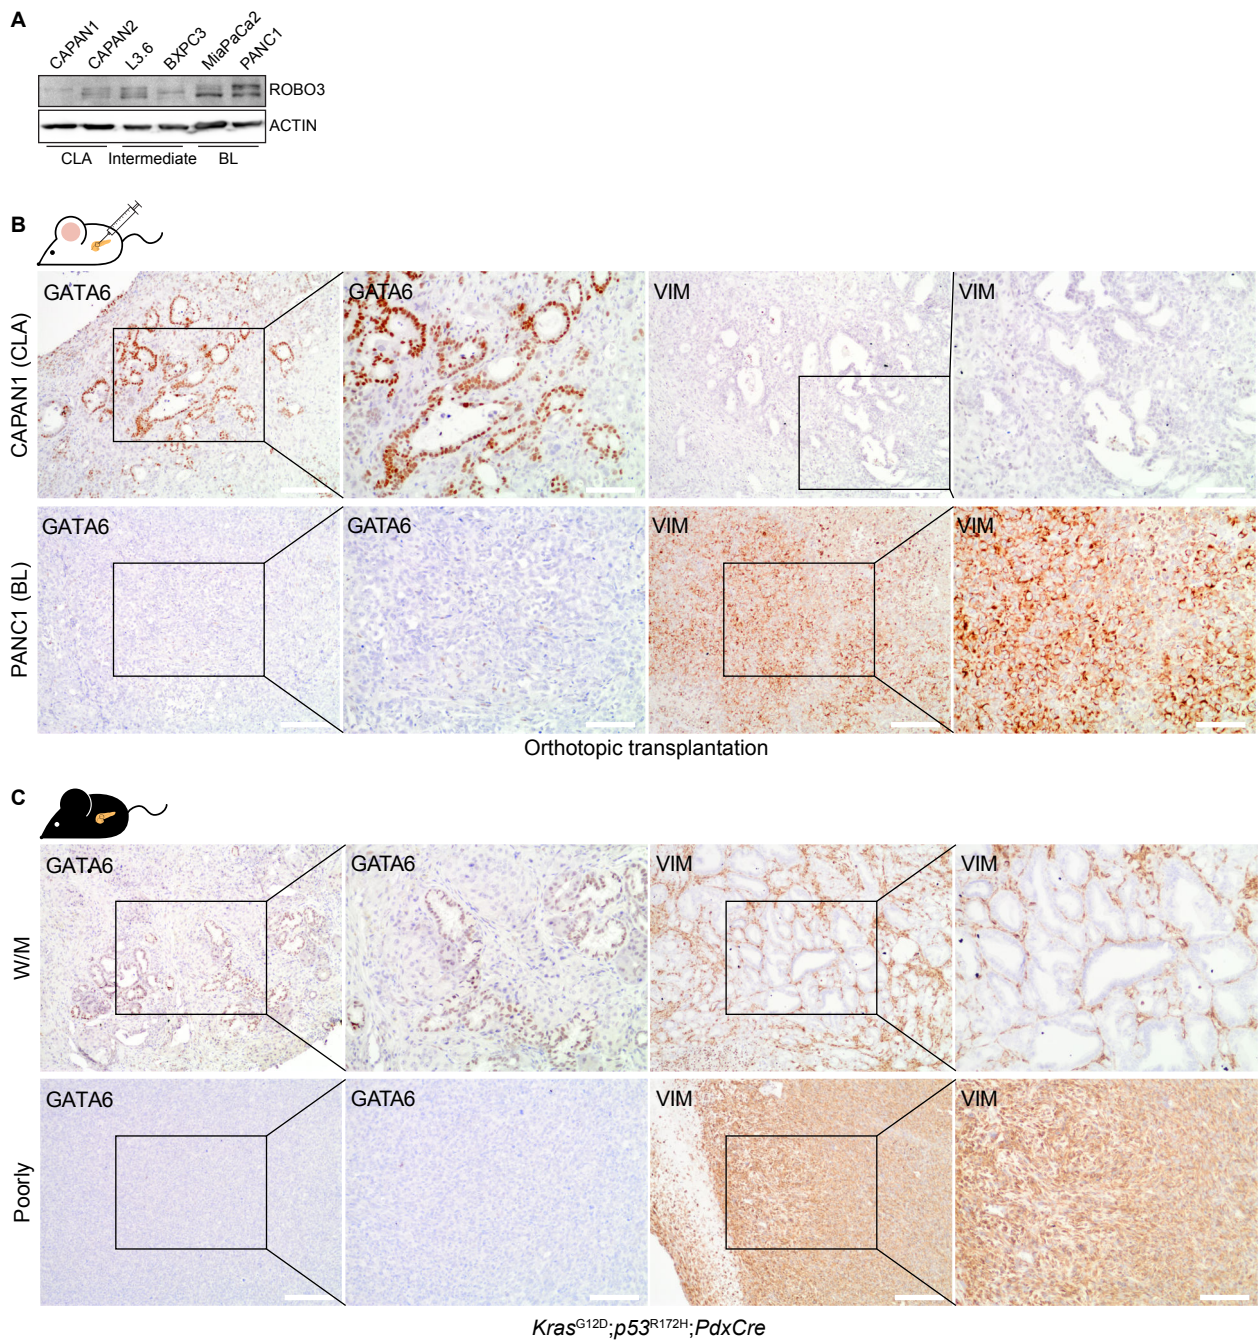

**Supplemental Figure 1. PDAC subtype-dependent expression of ROBO3.** (A) Immunoblot analysis for ROBO3 and  $\beta$ -actin as loading control in CLA (CAPAN1, CAPAN2), intermediate (L3.6, BXPC3) and BL (MiaPaCa2, PANC1) PDAC cell lines. Representative of n=3. (B,C) Representative IHC staining for GATA6 and vimentin (VIM) in orthotopically implanted CLA (CAPAN1) and BL (PANC1) cell lines in the pancreas of NMRI-*Foxn1*<sup>nu/nu</sup> mice (B), as well as in *Kras*<sup>G12D</sup>;*p53*<sup>R172H</sup>;*Cre* (KPC) tumors, histopathologically graded by expert pathologists (C). Higher magnification of the indicated areas are shown. Scale bar: 200  $\mu$ m; for magnified area (right panels), 50  $\mu$ m. (B) CLA, n=3; BL, n=3. (C) W/M, n=4; poorly, n=4.

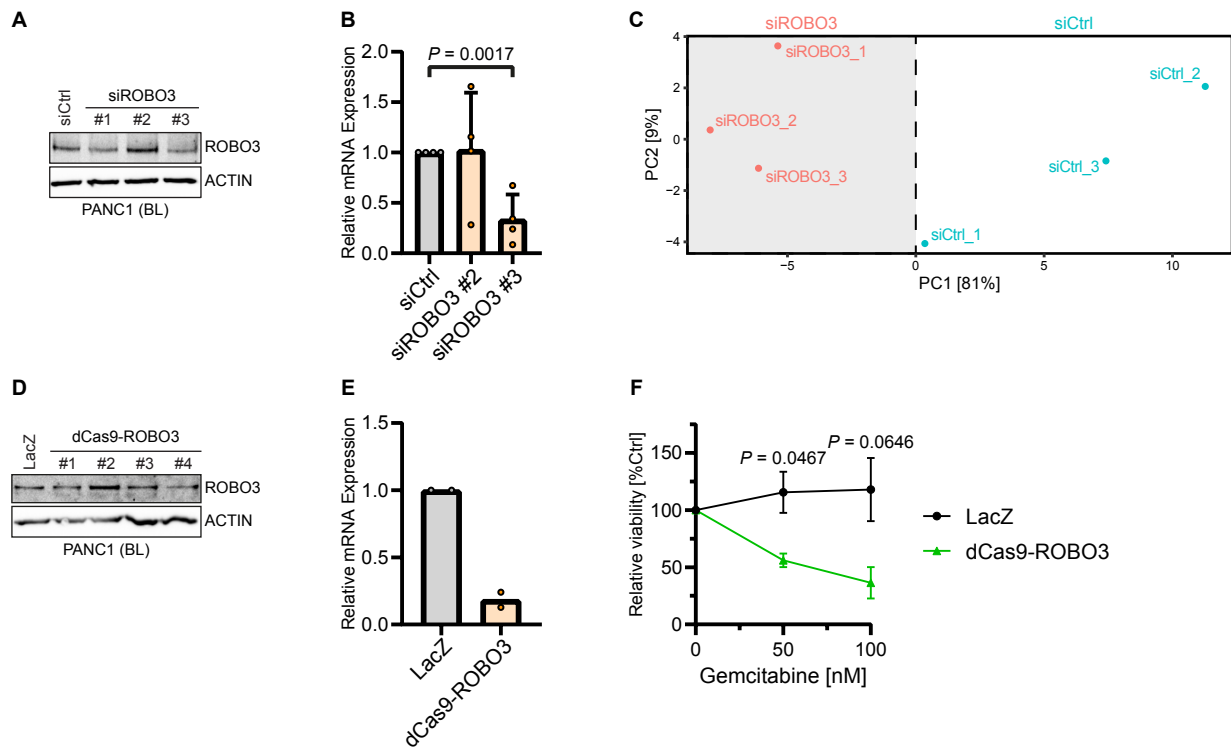

**Supplemental Figure 2. Depletion of ROBO3 in BL PDAC.** (A) Immunoblot analysis for ROBO3 and  $\beta$ -actin in BL (PANC1) cells transfected with different sequences of ROBO3-targeting (siROBO3) or control siRNA (siCtrl). Representative of  $n=3$  independent experiments. Sequence #3 was used for all other experiments in this study. (B) RT-qPCR analysis of ROBO3 in BL PANC1 cells transfected with siROBO3 or siCtrl. Results show average relative quantification (to control treatment)  $\pm$  SD.  $n=4$ . (C) PCA plot of RNA-seq data performed on BL PANC1 cells transfected with siROBO3 or siCtrl.  $n=3$ . (D) Immunoblot analysis for ROBO3 and  $\beta$ -actin, in BL PANC1 cells with CRISPR/dCas9-mediated knockdown of ROBO3 using different sgRNA-sequences or LacZ-transfected control cells. sgRNA sequence #4 was used for all other experiments in this study. (E) RT-qPCR analysis of ROBO3 in LacZ control and dCas9-ROBO3 PANC1 cells. Results show average relative quantification (to control treatment)  $\pm$  SD.  $n=2$ . (F) Cell viability of LacZ control and dCas9-ROBO3 PANC1 cells after treatment with the indicated concentrations of gemcitabine for 72h.  $n=4$ . (B,F) Significance was determined by an unpaired Student's t-test.

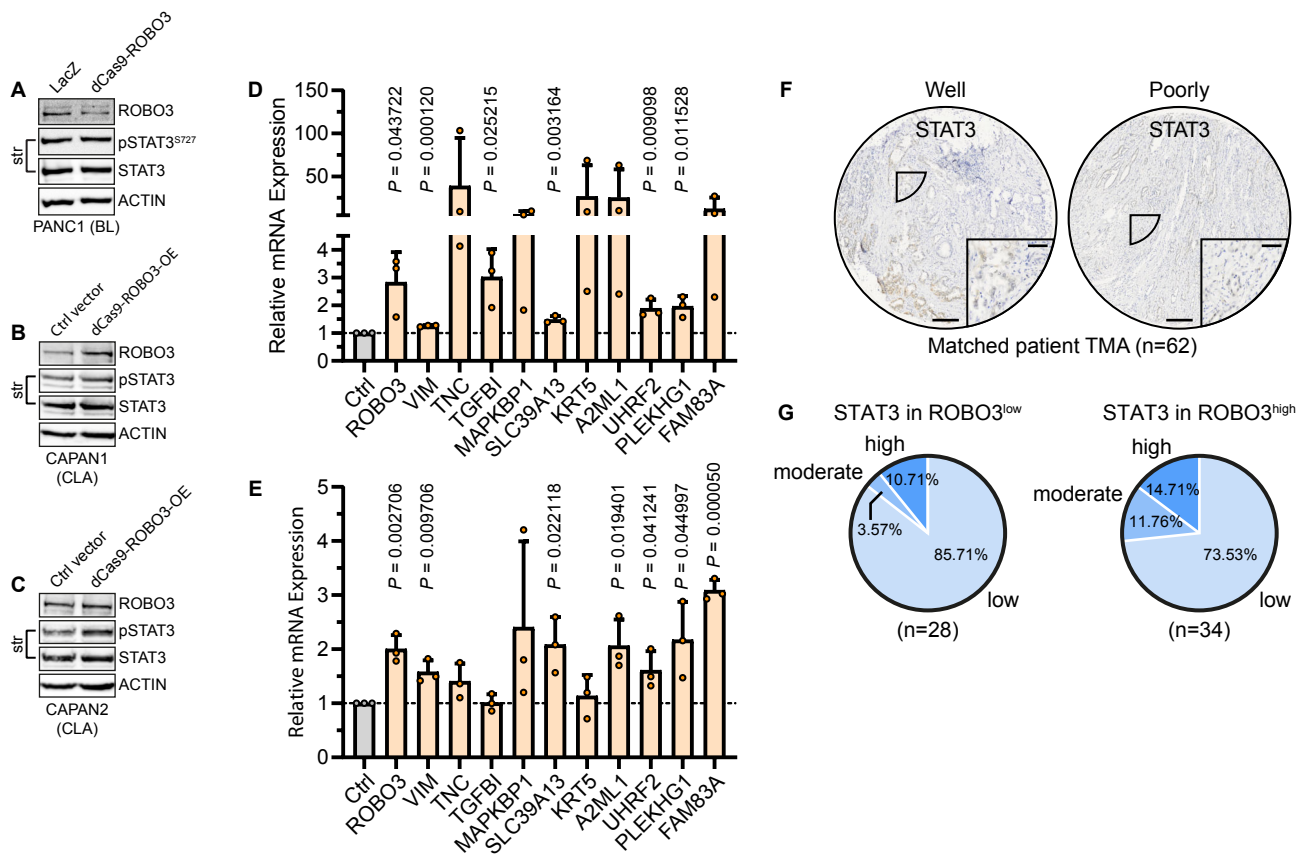

**Supplemental Figure 3. ROBO3-dependent pSTAT3 axis.** (A) Immunoblot analysis for ROBO3, S727-phosphorylated (pSTAT3<sup>S727</sup>) and total STAT3, as well as  $\beta$ -actin as loading control, in LacZ control and dCas9-ROBO3 PANC1 cells. (B,C) Immunoblot analysis for ROBO3, Y705-phosphorylated (pSTAT3) and total STAT3, as well as  $\beta$ -actin as loading control, in control vector and dCas9-mediated ROBO3 overexpressing CAPAN1 (B) and CAPAN2 (C) cells. (A-C) Representative of n=3 independent experiments. (D,E) RT-qPCR analysis of selected BL genes, based on the published data of Collisson, Moffitt and Bailey, in control vector and dCas9-mediated ROBO3 overexpressing CAPAN1 (D) and CAPAN2 (E) cells. Results show average relative quantification (to control vector)  $\pm$  SD. Significance was determined by an unpaired Student's t-test. n=3. (F) Representative IHC staining for STAT3 of tumor microarray (TMA) spots of primary PDAC tissue derived from 62 human PDAC patient resection tissue. Scale bar: 200  $\mu$ m; for magnified area, 50  $\mu$ m. (G) Evaluation of STAT3 IHC immunoreactive scores (IRS, scale 0-12) of TMA spots in ROBO3<sup>low</sup> (left; ROBO3 intensity <2, n=28) and ROBO3<sup>high</sup> (right; ROBO3 intensity  $\geq$ 2, n=34) patients. Low, IRS <6; moderate, 6  $\leq$  IRS < 8; high, IRS  $\geq$  8. Histopathological grading performed by expert pathologists. 1-3 TMA spots were evaluated and averaged per patient. n=62.

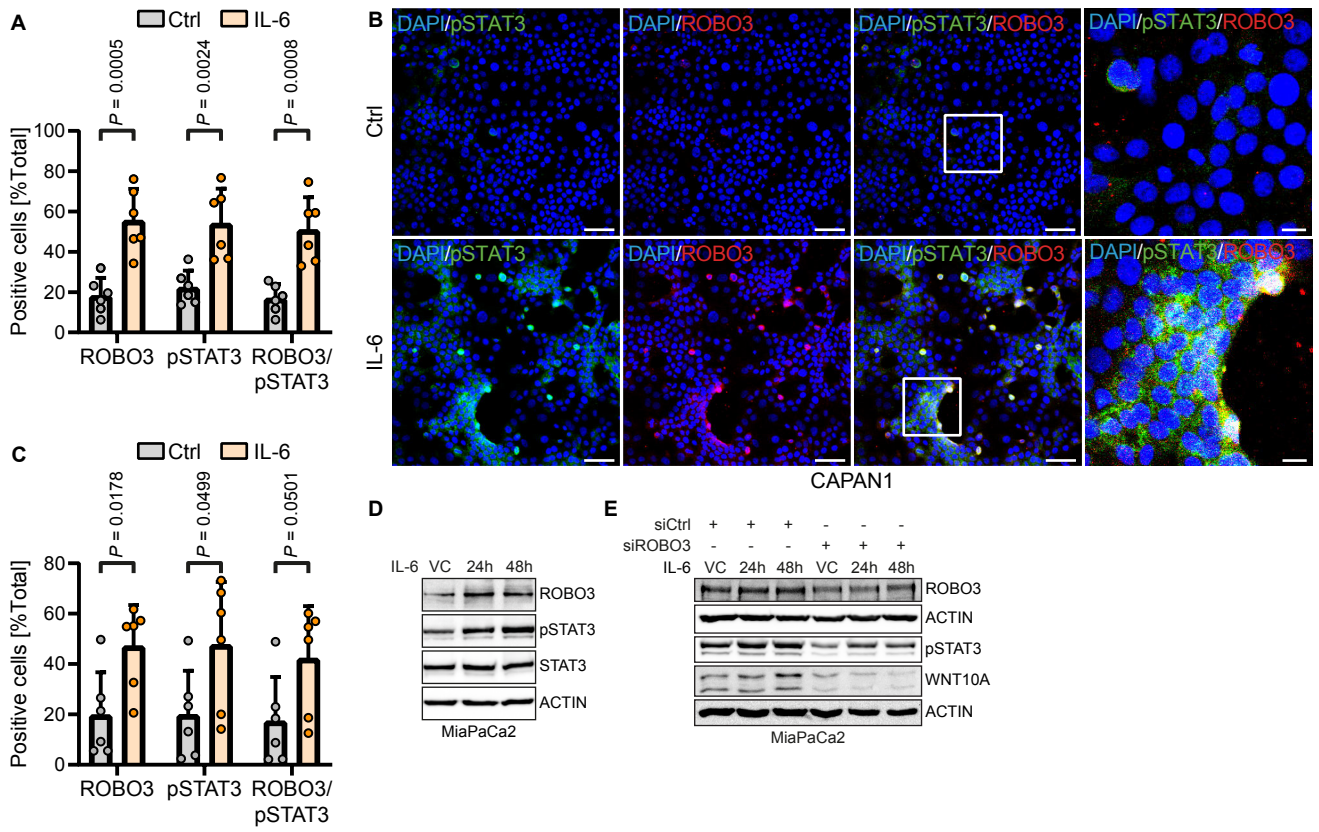

**Supplemental Figure 4. IL-6 induces co-expression of pSTAT3<sup>Y705</sup> and ROBO3.** (A) Quantification of IF staining for Y705-phosphorylated STAT3 (pSTAT3) and ROBO3 following IL-6 treatment for 48 h or control treatment in basal-like (BL) PANC1 cells. Scatter plots show average number of ROBO3<sup>+</sup>, pSTAT3<sup>+</sup> or double-positive cells as well as means  $\pm$  SD as bar graphs. Statistical significance was determined by an unpaired Student's t-test. n=6. (B) Representative IF staining for pSTAT3 and ROBO3 following IL-6 treatment for 48 h or control treatment in classical (CLA) CAPAN1 cells. Scale bar: 50  $\mu$ m; for magnified area (right panel), 10  $\mu$ m. (C) Quantification of (B), as in (A). n=6. (D) Immunoblot analysis for ROBO3, pSTAT3, STAT3, as well as  $\beta$ -actin as loading control, in BL MiaPaCa2 cells following IL-6 treatment for 24 and 48 h or VC. (E) Immunoblot analysis for ROBO3, pSTAT3, STAT3, WNT10A, as well as  $\beta$ -actin as loading control, in BL MiaPaCa2 cells transfected with ROBO3-targeting (siROBO3) or control siRNA (siCtrl), additionally treated with IL-6 for 24 and 48 h or VC. (D,E) Representative of n=3 independent experiments.

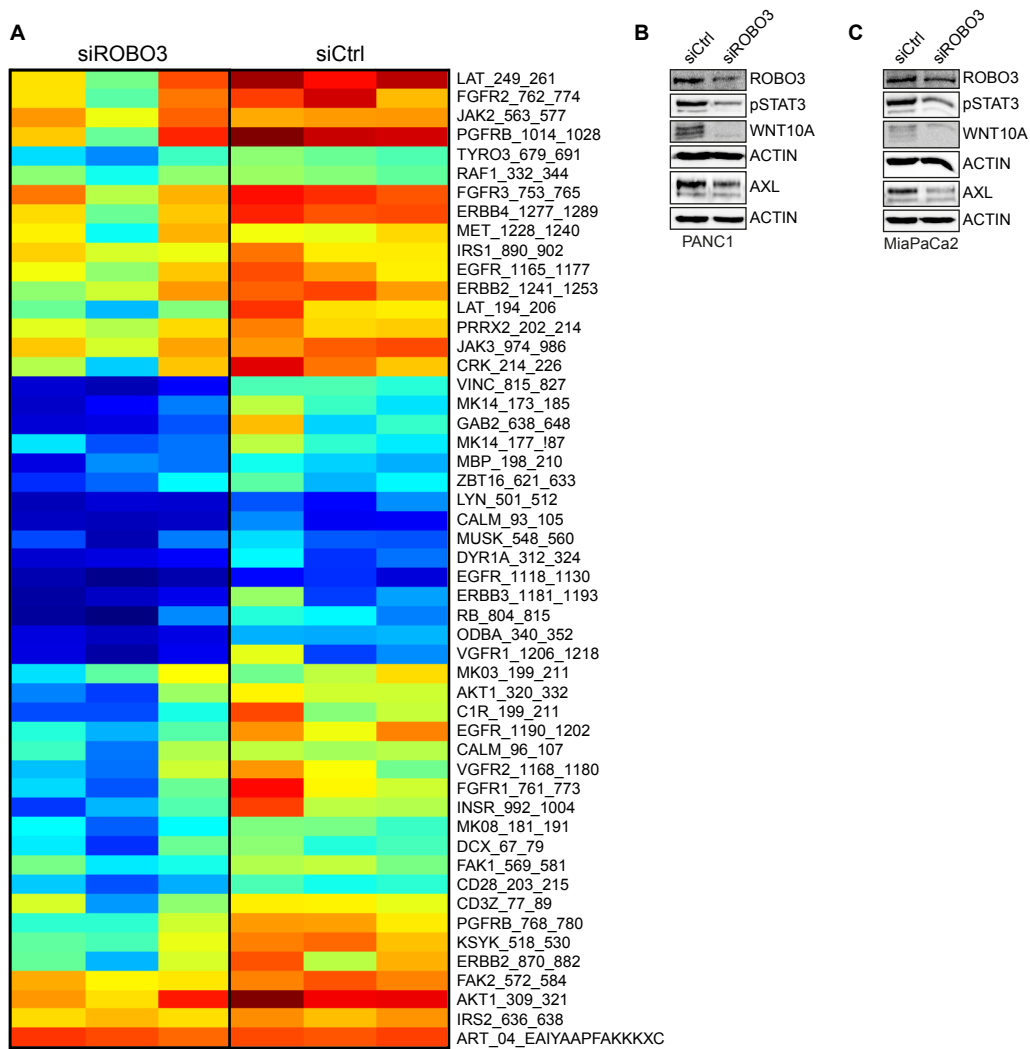

**Supplemental Figure 5. ROBO3 activates STAT3 phosphorylation via AXL.** (A) Differential kinase activity of significant peptide signatures in PANC1 cells upon siROBO3 or siCtrl. Represented in the heatmap are the individual intensities of phosphorylation of all quality-controlled peptides which serve as substrates for tyrosine kinases on PTK chips. Representative of n=3 independent experiments. (B,C) Immunoblot analysis for ROBO3, AXL, Y705-phosphorylated STAT3 (pSTAT3), WNT10A, as well as  $\beta$ -actin as loading control, in BL PANC1 (B) and MiaPaCa2 (C) cells transfected with ROBO3-targeting (siROBO3) or control siRNA (siCtrl).

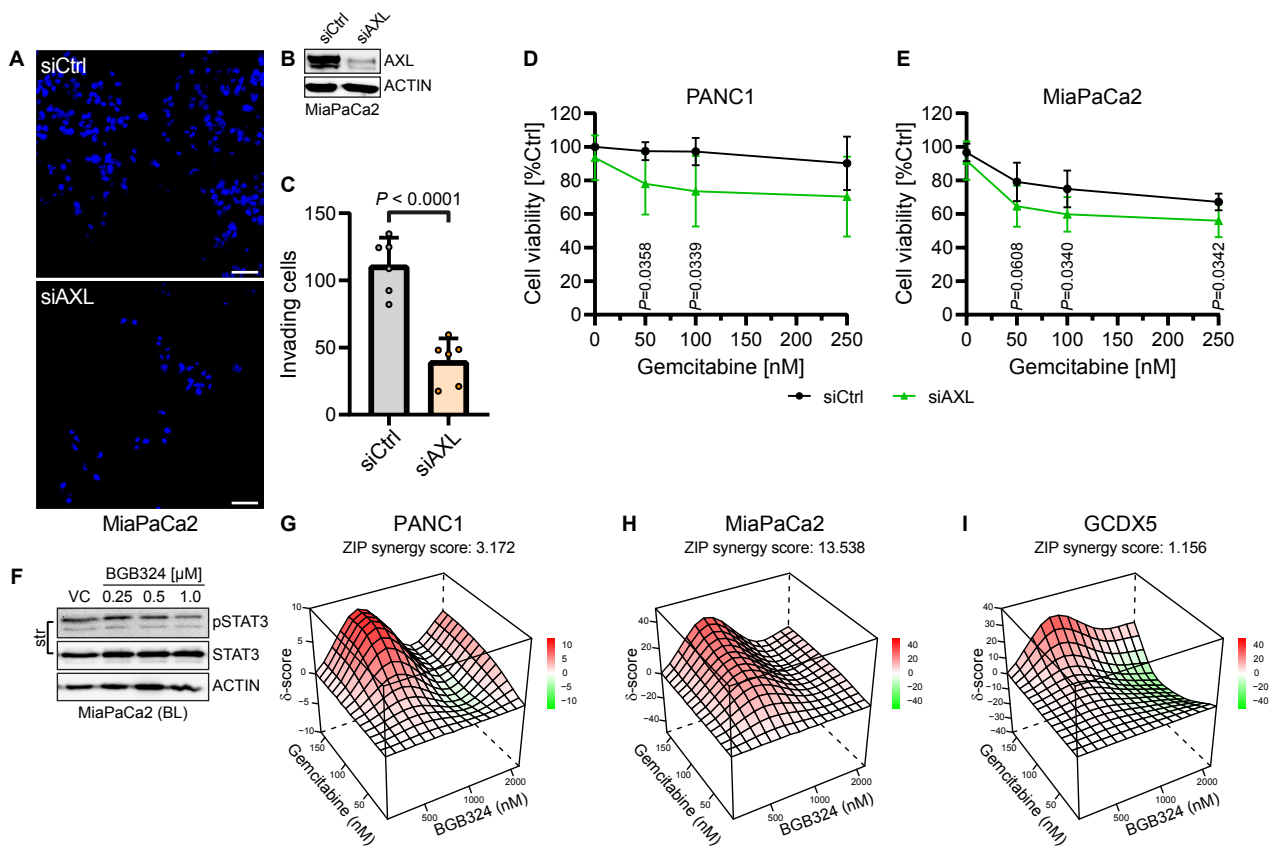

**Supplemental Figure 6. AXL silencing leads to reduced aggressiveness in BL cells.** (A-C) Trans-well invasion assay of basal-like (BL) MiaPaCa2 cells transfected with AXL-targeting (siAXL #2) or control siRNA (siCtrl). (A) Representative DAPI staining of invaded cells. Scale bar: 50  $\mu$ m. (B) Immunoblot analysis for AXL and  $\beta$ -actin as loading control. Representative of n=3 independent experiments. (C) Quantification of (A). Scatter plots show average counts as well as means  $\pm$  SD as bar graphs. Statistical significance was determined by an unpaired Student's t-test. n=6. (D,E) Cell viability of BL PANC1 (D) and MiaPaCa2 (E) cells transfected with siAXL (#2) or siCtrl and subsequently treated with the indicated concentrations of gemcitabine for 48 h. n=6. (F) Immunoblot analysis for Y705-phosphorylated (pSTAT3) and total STAT3, as well as  $\beta$ -actin as loading control, in BL MiaPaCa2 cells treated with the indicated concentrations of BGB324 for 24 h or vehicle control (VC). Representative of n=3 independent experiments. (G-I) Synergy plots of PANC1 (G), MiaPaCa2 (H) and GCDX5 (I) cells treated in combination with the indicated concentrations of gemcitabine and BGB324. n=3.

**Supplemental Table 1. qRT-PCR primers, siRNAs and constructs**

| Target                        |         | Sequence                | Application  | Species | Company                 | Assay-ID |
|-------------------------------|---------|-------------------------|--------------|---------|-------------------------|----------|
| <b>A2ML1</b>                  | Forward | CTAGGAATGTTGGCCCTATCACC | RT-PCR       | human   | Sigma Aldrich           |          |
|                               | Reverse | CAAACAAACCTTCTGAACGGAG  | RT-PCR       | human   | Sigma Aldrich           |          |
| <b>AGR2</b>                   | Forward | GTCAGCATTCTTGCTCCTTGT   | RT-PCR       | human   | Sigma Aldrich           |          |
|                               | Reverse | GGGTGCGAGAGTCCTTTGTGTC  | RT-PCR       | human   | Sigma Aldrich           |          |
| <b>ALDH1B</b>                 | Forward | CCCATTCTGAACCCAGACATC   | RT-PCR       | human   | Sigma Aldrich           |          |
|                               | Reverse | AATGACCTCCCCGGTGGTA     | RT-PCR       | human   | Sigma Aldrich           |          |
| <b>CAPN8</b>                  | Forward | TGGCTCCAACCAAAACGCTT    | RT-PCR       | human   | Sigma Aldrich           |          |
|                               | Reverse | CCTGGTCCAAGATCCTTGTAGC  | RT-PCR       | human   | Sigma Aldrich           |          |
| <b>CDC42</b>                  | Forward | CCATCGGAATATGTACCGACTG  | RT-PCR       | human   | Sigma Aldrich           |          |
|                               | Reverse | CTCAGCGGTGTAATCTGTCA    | RT-PCR       | human   | Sigma Aldrich           |          |
| <b>cMET</b>                   | Forward | AGCAATGGGGAGGTAAAGAGG   | RT-PCR       | human   | Sigma Aldrich           |          |
|                               | Reverse | CCCAGTCTTGTACTCAGCAAC   | RT-PCR       | human   | Sigma Aldrich           |          |
| <b>ERBB3</b>                  | Forward | GGTGATGGGGAACCTTGAGAT   | RT-PCR       | human   | Sigma Aldrich           |          |
|                               | Reverse | CTGTCACTTCTCGAATCCACTG  | RT-PCR       | human   | Sigma Aldrich           |          |
| <b>FAM83A</b>                 | Forward | GGCCCTAAGGGACTGGACT     | RT-PCR       | human   | Sigma Aldrich           |          |
|                               | Reverse | CACAGTGGCGCTGGATTTTT    | RT-PCR       | human   | Sigma Aldrich           |          |
| <b>KRT5</b>                   | Forward | CCAAGGTTGATGCACTGATGG   | RT-PCR       | human   | Sigma Aldrich           |          |
|                               | Reverse | TGTCAGAGACATGCGTCTGC    | RT-PCR       | human   | Sigma Aldrich           |          |
| <b>MAPKBP1</b>                | Forward | CTGTGGAAGGGTCAACCATTAC  | RT-PCR       | human   | Sigma Aldrich           |          |
|                               | Reverse | GTCTCTCGTCCGTTTCTCTG    | RT-PCR       | human   | Sigma Aldrich           |          |
| <b>Nestin</b>                 | Forward | CTGTACCCTTGAGACACCTG    | RT-PCR       | human   | Sigma Aldrich           |          |
|                               | Reverse | GGGCTCTGATCTCTGCATCTAC  | RT-PCR       | human   | Sigma Aldrich           |          |
| <b>PLEKHG1</b>                | Forward | CTGCACCTGGACTTGACAG     | RT-PCR       | human   | Sigma Aldrich           |          |
|                               | Reverse | CCAACAGCAGATCCGTGAAGA   | RT-PCR       | human   | Sigma Aldrich           |          |
| <b>ROBO3</b>                  | Forward | GTAGGACCGGAGGACGCTAT    | RT-PCR       | human   | Sigma Aldrich           |          |
|                               | Reverse | CCCCGTTCTTGTACCACTCA    | RT-PCR       | human   | Sigma Aldrich           |          |
| <b>SLC39A13</b>               | Forward | TCAGCGGCTACCTCAACCT     | RT-PCR       | human   | Sigma Aldrich           |          |
|                               | Reverse | AGGAGCCGATCTTCTTGTCT    | RT-PCR       | human   | Sigma Aldrich           |          |
| <b>SOX2</b>                   | Forward | GCCGAGTGGAAACTTTTGTCTG  | RT-PCR       | human   | Sigma Aldrich           |          |
|                               | Reverse | GGCAGCGTGTACTTATCCTTCT  | RT-PCR       | human   | Sigma Aldrich           |          |
| <b>TGFBI</b>                  | Forward | CTGTGGAAGGGTCAACCATTAC  | RT-PCR       | human   | Sigma Aldrich           |          |
|                               | Reverse | GTCTCTCGTCCGTTTCTCTG    | RT-PCR       | human   | Sigma Aldrich           |          |
| <b>TNC</b>                    | Forward | TCCAGTGTTCCGGTGGATCT    | RT-PCR       | human   | Sigma Aldrich           |          |
|                               | Reverse | TTGATGCGATGTGTGAAGACA   | RT-PCR       | human   | Sigma Aldrich           |          |
| <b>UHRF2</b>                  | Forward | GGCACATCTACACAGATTGAGG  | RT-PCR       | human   | Sigma Aldrich           |          |
|                               | Reverse | CAAGCCGACATCTCTGGC      | RT-PCR       | human   | Sigma Aldrich           |          |
| <b>XS13</b>                   | Forward | TGGGCAAGAACACCATGATG    | RT-PCR       | human   | Sigma Aldrich           |          |
|                               | Reverse | AGTTTCTCCAGAGCTGGGTTGT  | RT-PCR       | human   | Sigma Aldrich           |          |
| <b>AXL</b>                    |         | #1                      | siRNA #1     | human   | ThermoFisher Scientific | s1846    |
| <b>AXL</b>                    |         | #2                      | siRNA #2     | human   | ThermoFisher Scientific | s1847    |
| <b>ROBO3</b>                  |         | #1                      | siRNA #1     | human   | ThermoFisher Scientific | 241788   |
| <b>ROBO3</b>                  |         | #2                      | siRNA #2     | human   | ThermoFisher Scientific | s34572   |
| <b>ROBO3</b>                  |         | #3                      | siRNA #3     | human   | ThermoFisher Scientific | 29905    |
| <b>ROBO3 sgRNA</b>            | #1      | GGGACTCCGGCACTAGGGGG    | CRISPR-dCas9 | human   |                         |          |
| <b>ROBO3 sgRNA</b>            | #2      | CCCCTAGTGCCGGAGTCCCC    | CRISPR-dCas9 | human   |                         |          |
| <b>ROBO3 sgRNA</b>            | #3      | TTCTCTCCACCCCTAGTGC     | CRISPR-dCas9 | human   |                         |          |
| <b>ROBO3 sgRNA</b>            | #4      | CCACGGTGCCGCTCTCCTGC    | CRISPR-dCas9 | human   |                         |          |
| <b>ROBO3 sgRNA</b>            | #1      | TCTAGTGTCTTACGGCCCT     | dCas9-p300   | human   |                         |          |
| <b>ROBO3 sgRNA</b>            | #2      | GCTCGGATTTATGTCTTCCC    | dCas9-p300   | human   |                         |          |
| <b>ROBO3 sgRNA</b>            | #3      | CTTCTGCCCAACTTTAGAAC    | dCas9-p300   | human   |                         |          |
| <b>pSLQ1658-dCas9-EGFP</b>    |         |                         | CRISPR-dCas9 | human   | Addgene                 | #51023   |
| <b>Cas9 sgRNA vector</b>      |         |                         | CRISPR-dCas9 | human   | Addgene                 | #68463   |
| <b>dCas9-p300 Core vector</b> |         |                         | CRISPR-dCas9 | human   | Addgene                 | #61357   |

|                                                |                  |       |         |        |
|------------------------------------------------|------------------|-------|---------|--------|
| <b>dCas9-p300<br/>Core(D1399<br/>Y) vector</b> | CRISPR-<br>dCas9 | human | Addgene | #61358 |
| <b>pSPgRNA<br/>vector</b>                      | CRISPR-<br>dCas9 | human | Addgene | #47108 |

**Supplemental Table 2. Antibodies**

| <b>Name</b>                      | <b>Company</b>            | <b>Catalog</b> | <b>Dilution</b>                      |
|----------------------------------|---------------------------|----------------|--------------------------------------|
| Anti-AXL antibody                | Cell Signaling Technology | 8661           | 1:1000 (WB), 1:100 (IHC), 1:200 (IP) |
| HRP-linked $\beta$ -Actin        | Sigma-Aldrich             | A3854          | 1:40000 (WB)                         |
| Anti-pSTAT3 antibody             | Cell Signaling Technology | 9145           | 1:1000 (WB), 1:100 (IF; IHC)         |
| Anti-pSTAT3 antibody             | Abcam                     | ab76315        | 1:1000 (WB)                          |
| Anti-ROBO3 antibody              | Abcam                     | ab77261        | 1:1000 (WB)                          |
| Anti-ROBO3 antibody              | R & D Systems             | AF3076         | 1:1000 (WB), 1:50 (IF), 1:100 (IHC)  |
| Anti-STAT3 antibody              | Cell Signaling Technology | 9139           | 1:1000 (WB), 1:500 (IHC)             |
| Anti-GATA6 antibody              | R D Systems               | AF1700         | 1:350 (IHC)                          |
| Anti-VIM antibody                | Abcam                     | ab92547        | 1:200 (IHC) (for murine)             |
| Anti-VIM antibody                | Pharmingen                | 550513         | 1:150 (IHC) (for human)              |
| Anti-WNT10A antibody             | Sigma-Aldrich             | ABS456         | 1:1000 (WB)                          |
| Anti-CD45 antibody               | Miltenyi Biotec           | 5B1            | 1:10 (FC)                            |
| Anti-CD326 (EpCAM) antibody      | Miltenyi Biotec           | HEA-125        | 1:10 (FC)                            |
| Anti-WNT10A antibody             | Novus Biologicals         | NBP1-76916     | 1:1000 (WB)                          |
| HRP anti-goat                    | Santa Cruz                | Sc-2020        | 1:5000 (WB)                          |
| HRP anti-mouse                   | Cell Signaling Technology | 7076S          | 1:6000 (WB)                          |
| HRP anti-rabbit                  | Cell Signaling Technology | 7074S          | 1:6000 (WB)                          |
| Rabbit IgG                       | Diagenode                 | C15410206      | 2 $\mu$ g (IP)                       |
| Anti-EGFP antibody               | Abcam                     | ab13970        | 1:1000 (IF)                          |
| Anti-IL-6 antibody               | Abcam                     | ab6672         | 1:50 (IF)                            |
| Anti-IL-6 antibody               | Biologend                 | 504503         | 1: 20 (FC)                           |
| Anti-E-Cadherin antibody         | BD Bioscience             | 610181         | 1:100 (IF)                           |
| Goat anti-rabbit Alexa Fluor 488 | ThermoFisher Scientific   | A-11008        | 1:500 (IF)                           |
| Goat anti-mouse Alexa Fluor 568  | ThermoFisher Scientific   | A-21124        | 1:500 (IF)                           |
| Donkey anti-goat Alexa Fluor 568 | ThermoFisher Scientific   | A-11057        | 1:500 (IF)                           |

**Supplemental Table 3**

| Chang-Seng-Yue: Basal-A | Chang-Seng-Yue: Basal-B |
|-------------------------|-------------------------|
| PGF                     | CFAP45                  |
| ADM                     | RHEBL1                  |
| PANX2                   | ZMYND10                 |
| PIK3R3                  | RIBC2                   |
| HAS3                    | SLC4A11                 |
| GATSL3                  | GINS2                   |
| ADRB2                   | BDNF                    |
| FAM127C                 | PLA2G16                 |
| LY6K                    | PPP1R1C                 |
| PLEKHF1                 | SKAP1                   |
| ZNF385A                 | ANXA9                   |
| ANKRD33B                | C11orf63                |
| EYA2                    | TNNI3                   |
| FAM212B                 | MLF1                    |
| ADORA2B                 | ANKRD1                  |
| CHST7                   | LRRC73                  |
| ADA                     | RAMP1                   |
| SNCG                    | PBK                     |
| TFAP2C                  | KRT80                   |
| S100A2                  | C9orf116                |
| FJX1                    | CFAP57                  |
| CLEC2B                  | CHRNA5                  |
| HSPB1                   | PIFO                    |
| TNNT1                   | TRIM59                  |
| SLC7A5                  | CRIP2                   |
| ZIC2                    | FOSL1                   |
| FAM225A                 | TTLL9                   |
| BASP1                   | C2orf81                 |
| HSPB8                   | TCTEX1D2                |
| STC2                    | MRPS17                  |
| GALNT18                 | VSIG10L                 |
| LAG3                    | THAP10                  |
| FBXO27                  | CCDC74B                 |
| P2RY2                   | DKK1                    |
| CTSV                    | TRIM36                  |
| IL31RA                  | BIRC3                   |
| KRT15                   | VSTM2L                  |
| ZP3                     | FSIP1                   |
| RHOV                    | KCNH3                   |
| PACSIN3                 | LRRC46                  |
| SCML2                   | MNS1                    |
| KLC3                    | NRP2                    |
| ULBP2                   | BATF2                   |
| S100A3                  | FBXO24                  |
| CBX2                    | KIAA1549L               |

|          |            |
|----------|------------|
| SLCO1B3  | CLDN9      |
| ANXA1    | AP1S2      |
| TUBB6    | NXNL2      |
| ALOXE3   | E2F7       |
| GPR19    | SPTBN5     |
| RHCG     | C7orf57    |
| FOXD1    | SPAG8      |
| FAM46B   | MTAP       |
| CRABP2   | RARRES3    |
| PLTP     | CDKL2      |
| NXN      | MALL       |
| TMEM40   | DNAAF3     |
| TCF7L1   | CFP        |
| NUPR1    | FRMD5      |
| GGH      | SH3TC2     |
| MME      | RASAL2-AS1 |
| SLC2A9   | TGM2       |
| LRFN1    | L1CAM      |
| EPHB2    | TMEM169    |
| SCPEP1   | F3         |
| TRIM6    | PCDH7      |
| ST20     | OXTR       |
| PARVB    | MYBL1      |
| NRG1     | C15orf48   |
| CERS4    | IFITM1     |
| NKX3-1   | ELFN2      |
| A4GALT   | EFHB       |
| TP73     | WNT10A     |
| SIX1     | C15orf62   |
| NDRG1    | C11orf70   |
| MCTP1    | RAB36      |
| MT1X     | HERC5      |
| C9orf84  | DNAH3      |
| CAV1     | IFNE       |
| CAMK1D   | OAS2       |
| RYR1     | C15orf52   |
| ABCA4    | MX1        |
| MAPK11   | CCDC114    |
| ADARB1   | CFAP157    |
| AQP3     | AMIGO2     |
| FAAP24   | IFIT1      |
| NDUFA4L2 | DCBLD2     |
| DYNC111  | PMAIP1     |
| DMKN     |            |
| MT2A     |            |
| SCNN1B   |            |
| C17orf53 |            |
| PHGDH    |            |

|              |
|--------------|
| ALDH1A3      |
| NBPF26       |
| C12orf60     |
| PPP2R2C      |
| ETNK2        |
| TBX1         |
| PLAU         |
| FBXO48       |
| CLEC2D       |
| WNT5B        |
| HS6ST1       |
| RFESD        |
| ANGPTL4      |
| SEMA3F       |
| SYT7         |
| STOM         |
| SCHIP1       |
| KCNIP3       |
| FANCB        |
| EREG         |
| FSCN1        |
| ATP8B3       |
| GCLM         |
| HMGA2        |
| HAP1         |
| ESPN         |
| TMEM132A     |
| HES2         |
| GPNMB        |
| FIGN         |
| FST          |
| SYNM         |
| GS1-259H13.2 |
| ITGA2B       |
| GJB2         |
| P2RY6        |
| SLC22A4      |
| PYGL         |
| GJB6         |
| LYNX1        |
| XDH          |
| AKR1C1       |
| PFN2         |
| NETO2        |
| GNAI1        |
| IL20RB       |
| KCNS3        |
| EDARADD      |

|               |
|---------------|
| CFAP58        |
| ARSJ          |
| TOX2          |
| TLR6          |
| FGFR3         |
| CD109         |
| STARD5        |
| RP11-382A20.3 |
| TIAM1         |
| CPA4          |
| HACD1         |
| RNF217        |
| SHROOM2       |
| LAMP3         |
| GPR155        |
| TMEM156       |
| ADSSL1        |
| SLC39A8       |
| B3GNT4        |
| C11orf45      |
| KCNG1         |
| TMEM45A       |
| KRT13         |
| SRPX2         |
| CSNK2A3       |
| VWDE          |
| FABP5         |
| EME1          |
| KRT81         |
| SRGAP3        |
| EVA1A         |
| FAM126A       |
| FSTL4         |
| CNTNAP3       |
| BTBD11        |
| C18orf54      |
| IL27RA        |
| NGFR          |
| MCC           |
| PRSS27        |
| LPAR3         |
| SEMA3A        |
| FAM169A       |
| DNAH17        |
| LDLRAD3       |
| CHST15        |
| HSF2BP        |
| PTX3          |

|            |
|------------|
| CYP27C1    |
| PALMD      |
| RDX        |
| COL7A1     |
| DSC3       |
| CDH26      |
| TGM1       |
| WNT7B      |
| PTGES      |
| ARL4D      |
| KRT6A      |
| MAPK12     |
| CORO6      |
| RYR3       |
| KRT5       |
| SLITRK6    |
| FAM83A     |
| IRX3       |
| PTPN13     |
| PROM2      |
| TGFBI      |
| CACHD1     |
| PTHLH      |
| LCP1       |
| PDZD2      |
| TP63       |
| TENM2      |
| COL4A5     |
| FAT2       |
| EMP1       |
| PSTPIP2    |
| MTSS1      |
| KLHL13     |
| FGFBP1     |
| APOBEC3G   |
| DNER       |
| NT5M       |
| SCNN1G     |
| FLG        |
| WNT9A      |
| ZIC5       |
| CDH3       |
| ICAM5      |
| DFNA5      |
| SLC16A14   |
| TNC        |
| SIX4       |
| ST6GALNAC2 |

|           |
|-----------|
| ADIRF-AS1 |
| CYP26B1   |
| FHOD3     |
| SNAI2     |
| SLC37A2   |
| THBD      |
| KDM4D     |
